# Supplementary material for: Fish Scale for Wearable, Self-Powered TENG
Source: MDPI journal article supplement (doi:10.3390/nano14050463), 2024-03-03
Supplement: s1 [file s1]

## Supplementary materials

### Table of contents

**Figure S1.** Thermogravimetry analysis of Fish scale.

**Figure S2.** Electronic calculator powered by the TENG through the capacitor.

**Table S1.** Comparison of the output properties of fish scales with other triboelectric materials.

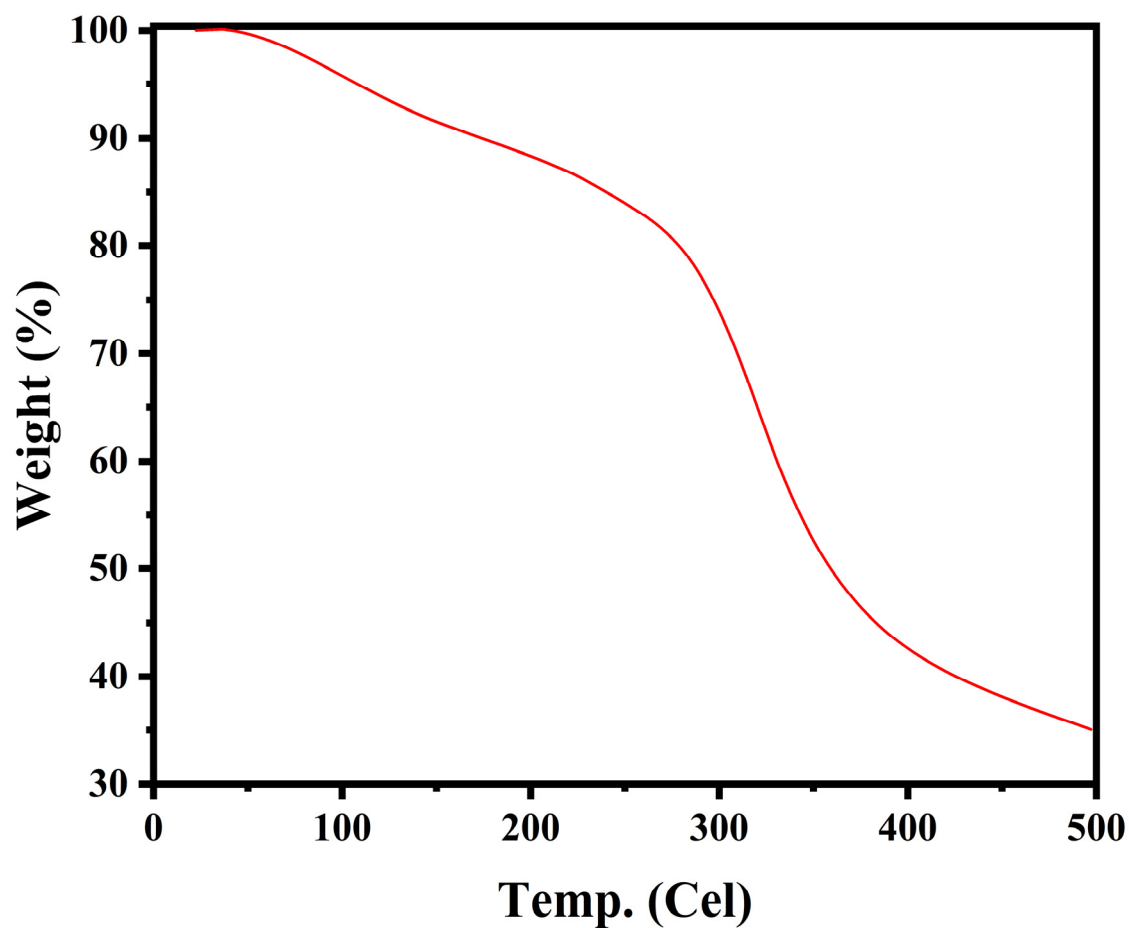

**Figure S1.** Thermogravimetry analysis of fish scale.

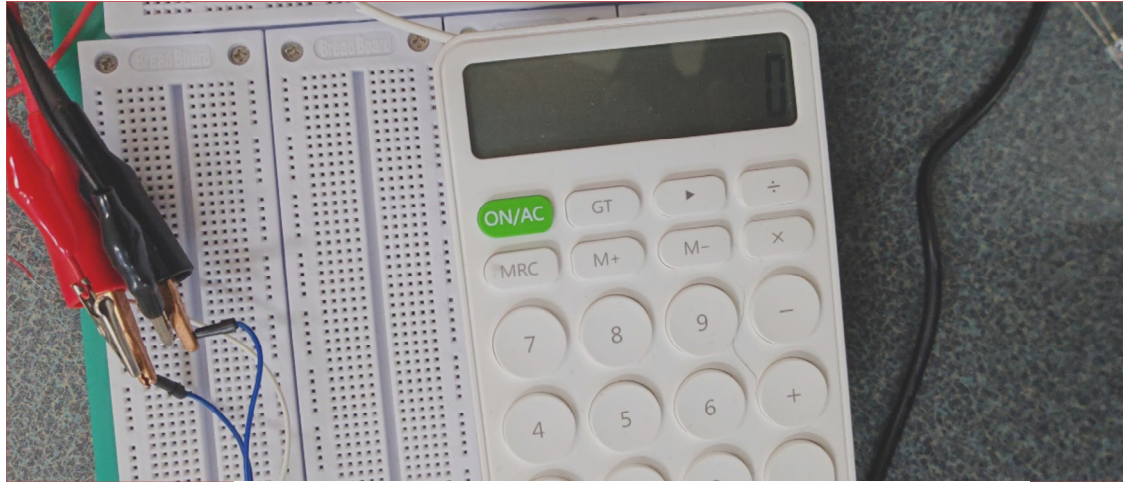

**Figure S2.** Electronic calculator powered by the TENG through the capacitor.

**Table S1.** Comparison of the output properties of fish scales with other triboelectric materials.

| Material                 | Voltage (V) | reference |
|--------------------------|-------------|-----------|
| fish scale               | 7.4         | This work |
| carbon nanotube          | 25          | [49]      |
| ZnO nanosheet            | 4           | [50]      |
| 3D knitted spacer fabric | 3           | [51]      |
